# Supplementary material
Source: PubMed Central journal article supplement (PMC9855759)
Supplement: res-132-187-s002.pdf [file res-132-187-s002.pdf]

## Major Resources Table

In order to allow validation and replication of experiments, all essential research materials listed in the Methods should be included in the Major Resources Table below. Authors are encouraged to use public repositories for protocols, data, code, and other materials and provide persistent identifiers and/or links to repositories when available. Authors may add or delete rows as needed.

### Antibodies

| Target antigen                             | Vendor or Source           | Catalog #     | Working concentration | Persistent ID / URL                                                                                                                                                                                                                                                               |
|--------------------------------------------|----------------------------|---------------|-----------------------|-----------------------------------------------------------------------------------------------------------------------------------------------------------------------------------------------------------------------------------------------------------------------------------|
| alpha-actinin                              | Sigma                      | A7811         | 1:1000                | <a href="https://www.sigmaaldrich.com/US/en/product/sigma/a7811">https://www.sigmaaldrich.com/US/en/product/sigma/a7811</a>                                                                                                                                                       |
| cardiac troponin T                         | Abcam                      | ab45932       | 1:500                 | <a href="https://www.abcam.com/cardiac-troponin-t-antibody-ab45932.html">https://www.abcam.com/cardiac-troponin-t-antibody-ab45932.html</a>                                                                                                                                       |
| NOTCH1                                     | Cell Signaling Technology  | 4147          | 1:1000                | <a href="https://www.cellsignal.com/products/primary-antibodies/cleaved-notch1-val1744-d3b8-rabbit-mab/4147">https://www.cellsignal.com/products/primary-antibodies/cleaved-notch1-val1744-d3b8-rabbit-mab/4147</a>                                                               |
| Ki67                                       | Abcam                      | ab15580       | 1:1000                | <a href="https://www.abcam.com/ki67-antibody-ab15580.html">https://www.abcam.com/ki67-antibody-ab15580.html</a>                                                                                                                                                                   |
| Cyclin D1                                  | Cell Signaling Technology, | 55506         | 1:1000                | <a href="https://www.cellsignal.com/products/primary-antibodies/cyclin-d1-e3p5s-xp-rabbit-mab/55506">https://www.cellsignal.com/products/primary-antibodies/cyclin-d1-e3p5s-xp-rabbit-mab/55506</a>                                                                               |
| MYL2                                       | Abcam                      | ab79935       | 1:1000                | <a href="https://www.abcam.com/myosin-light-chain-2-antibody-ab79935.html">https://www.abcam.com/myosin-light-chain-2-antibody-ab79935.html</a>                                                                                                                                   |
| COUP-TFII                                  | R&D Systems                | PP-H7147-00   | 1:1000                | <a href="https://www.rndsystems.com/products/human-coup-tf-ii-nr2f2-antibody-h7147_pp-h7147-00">https://www.rndsystems.com/products/human-coup-tf-ii-nr2f2-antibody-h7147_pp-h7147-00</a>                                                                                         |
| Phospho-Rb                                 | Cell Signaling Technology  | 8516          | 1:1000                | <a href="https://www.cellsignal.com/products/primary-antibodies/phospho-rb-ser807-811-d20b12-xp-rabbit-mab/8516">https://www.cellsignal.com/products/primary-antibodies/phospho-rb-ser807-811-d20b12-xp-rabbit-mab/8516</a>                                                       |
| GAPDH                                      | Thermo Fisher Scientific   | MA5-15738-HRP | 1:1000                | <a href="https://www.thermofisher.com/antibody/product/GAPDH-Loading-Control-Antibody-clone-GA1R-Monoclonal/MA5-15738-HRP">https://www.thermofisher.com/antibody/product/GAPDH-Loading-Control-Antibody-clone-GA1R-Monoclonal/MA5-15738-HRP</a>                                   |
| Nkx2-5                                     | Thermo Fisher Scientific   | PA5-49431     | 1:400                 | <a href="https://www.thermofisher.com/antibody/product/Nkx2-5-Antibody-Polyclonal/PA5-49431">https://www.thermofisher.com/antibody/product/Nkx2-5-Antibody-Polyclonal/PA5-49431</a>                                                                                               |
| ISL1                                       | Thermo Fisher Scientific   | MA5-15515     | 1:200                 | <a href="https://www.thermofisher.com/antibody/product/ISL1-Antibody-clone-1H9-Monoclonal/MA5-15515">https://www.thermofisher.com/antibody/product/ISL1-Antibody-clone-1H9-Monoclonal/MA5-15515</a>                                                                               |
| WT1                                        | Proteintech                | 12609-1-AP    | 1:200                 | <a href="https://www.ptglab.com/products/WT1-Antibody-12609-1-AP.htm">https://www.ptglab.com/products/WT1-Antibody-12609-1-AP.htm</a>                                                                                                                                             |
| TBX18                                      | R&D Systems                | mab63371      | 1:200                 | <a href="https://www.rndsystems.com/products/human-tbx18-antibody-635305_mab63371">https://www.rndsystems.com/products/human-tbx18-antibody-635305_mab63371</a>                                                                                                                   |
| TBXT                                       | R&D Systems                | AF2085        | 1:200                 | <a href="https://www.rndsystems.com/products/human-mouse-brachyury-antibody_af2085">https://www.rndsystems.com/products/human-mouse-brachyury-antibody_af2085</a>                                                                                                                 |
| TBX6                                       | Thermo Fisher Scientific   | PA5-35102     | 1:200                 | <a href="https://www.thermofisher.com/antibody/product/TBX6-Antibody-Polyclonal/PA5-35102">https://www.thermofisher.com/antibody/product/TBX6-Antibody-Polyclonal/PA5-35102</a>                                                                                                   |
| Goat anti-Mouse IgG (H+L), Alexa Fluor 594 | Thermo Fisher Scientific   | A-11032       | 1:2000                | <a href="https://www.thermofisher.com/antibody/product/Goat-anti-Mouse-IgG-H-L-Highly-Cross-Adsorbed-Secondary-Antibody-Polyclonal/A-11032">https://www.thermofisher.com/antibody/product/Goat-anti-Mouse-IgG-H-L-Highly-Cross-Adsorbed-Secondary-Antibody-Polyclonal/A-11032</a> |
| Goat anti-Mouse IgG (H+L), Alexa Fluor 488 | Thermo Fisher Scientific   | A-11001       | 1:2000                | <a href="https://www.thermofisher.com/antibody/product/Goat-anti-Mouse-IgG-H-L-Cross-Adsorbed-Secondary-Antibody-Polyclonal/A-11001">https://www.thermofisher.com/antibody/product/Goat-anti-Mouse-IgG-H-L-Cross-Adsorbed-Secondary-Antibody-Polyclonal/A-11001</a>               |

DOI [to be added]

|                                                  |                          |          |                            |                                                                                                                                                                                                                                                                                   |
|--------------------------------------------------|--------------------------|----------|----------------------------|-----------------------------------------------------------------------------------------------------------------------------------------------------------------------------------------------------------------------------------------------------------------------------------|
| Goat Anti-Rabbit IgG (H+L), Alexa Fluor 594      | Thermo Fisher Scientific | A-11012  | 1:2000                     | <a href="https://www.thermofisher.com/antibody/product/Goat-anti-Rabbit-IgG-H-L-Cross-Adsorbed-Secondary-Antibody-Polyclonal/A-11012">https://www.thermofisher.com/antibody/product/Goat-anti-Rabbit-IgG-H-L-Cross-Adsorbed-Secondary-Antibody-Polyclonal/A-11012</a>             |
| Donkey anti-Mouse IgG (H+L), Alexa Fluor 594     | Thermo Fisher Scientific | R37115   | 1:2000                     | <a href="https://www.thermofisher.com/antibody/product/Donkey-anti-Mouse-IgG-H-L-Secondary-Antibody-Polyclonal/R37115">https://www.thermofisher.com/antibody/product/Donkey-anti-Mouse-IgG-H-L-Secondary-Antibody-Polyclonal/R37115</a>                                           |
| Donkey anti-Rabbit IgG (H+L), Alexa Fluor 594    | Thermo Fisher Scientific | R37119   | 1:2000                     | <a href="https://www.thermofisher.com/antibody/product/Donkey-anti-Rabbit-IgG-H-L-Secondary-Antibody-Polyclonal/R37119">https://www.thermofisher.com/antibody/product/Donkey-anti-Rabbit-IgG-H-L-Secondary-Antibody-Polyclonal/R37119</a>                                         |
| Donkey anti-Goat IgG (H+L), Alexa Fluor Plus 488 | Thermo Fisher Scientific | A32814   | 1:2000                     | <a href="https://www.thermofisher.com/antibody/product/Donkey-anti-Goat-IgG-H-L-Highly-Cross-Adsorbed-Secondary-Antibody-Polyclonal/A32814">https://www.thermofisher.com/antibody/product/Donkey-anti-Goat-IgG-H-L-Highly-Cross-Adsorbed-Secondary-Antibody-Polyclonal/A32814</a> |
| Rabbit IgG Isotype Control                       | Abcam                    | ab172730 | Same as primary antibodies | <a href="https://www.abcam.com/Rabbit-IgG-monoclonal-EPR25A-Isotype-Control-ab172730.html">https://www.abcam.com/Rabbit-IgG-monoclonal-EPR25A-Isotype-Control-ab172730.html</a>                                                                                                   |
| Mouse IgG Isotype Control                        | Abcam                    | ab37355  | Same as primary antibodies | <a href="https://www.abcam.com/Mouse-IgG-Isotype-Control-ab37355.html">https://www.abcam.com/Mouse-IgG-Isotype-Control-ab37355.html</a>                                                                                                                                           |
| Goat IgG Isotype Control                         | Abcam                    | ab37373  | Same as primary antibodies | <a href="https://www.abcam.com/Goat-IgG-polyclonal-Isotype-Control-ab37373.html">https://www.abcam.com/Goat-IgG-polyclonal-Isotype-Control-ab37373.html</a>                                                                                                                       |

### DNA/cDNA Clones

| Clone Name | Sequence | Source / Repository | Persistent ID / URL |
|------------|----------|---------------------|---------------------|
| PX458      | Plasmid  | Addgene             | 48138               |

### Data & Code Availability

| Description              | Source / Repository | Persistent ID / URL |
|--------------------------|---------------------|---------------------|
| RNA-seq data             | NCBI GEO            | GSE195559           |
| Single-cell RNA-seq data | NCBI GEO            | GSE196632           |

### Other

| Description                               | Source / Repository      | Persistent ID / URL |
|-------------------------------------------|--------------------------|---------------------|
| B27 supplement                            | Thermo Fisher Scientific | 17504044            |
| B27 supplement minus insulin              | Thermo Fisher Scientific | A1895601            |
| bFGF                                      | Peprtech                 | 100-18B             |
| CD144 microbeads                          | Miltenyi Biotec          | 130-097-857         |
| CHIR99021                                 | Selleck Chemicals        | S2924               |
| CytoTune-iPS 2.0 Sendai Reprogramming Kit | Thermo Fisher Scientific | A16517              |
| DAPT                                      | Selleck Chemicals        | S2215               |
| EGM-2 medium                              | Lonza                    | CC-3162             |
| Essential 8 medium                        | Thermo Fisher Scientific | A1517001            |
| Gelatin solution, 2% in H2O               | Sigma                    | G1393               |
| Growth factor reduced Matrigel            | Corning                  | 356231              |

DOI [to be added]

|                                             |                          |            |
|---------------------------------------------|--------------------------|------------|
| IWR-1-endo                                  | Selleck Chemicals        | S7086      |
| KnockOut Serum Replacement (KSR)            | Thermo Fisher Scientific | 10828028   |
| Lipofectamine LTX Reagent with PLUS Reagent | Thermo Fisher Scientific | 15338100   |
| MitoTracker Green FM                        | Thermo Fisher Scientific | M7514      |
| Recombinant human EPO                       | Thermo Fisher Scientific | PHC9631    |
| Recombinant human FLT3                      | Thermo Fisher Scientific | PHC9414    |
| Recombinant human IL3                       | Peprtech                 | 200-03     |
| Recombinant human IL6                       | Thermo Fisher Scientific | PHC0065    |
| Recombinant human SCF                       | Thermo Fisher Scientific | 300-07     |
| RPMI 1640 medium                            | Thermo Fisher Scientific | 11875093   |
| RPMI 1640 medium, no glucose                | Thermo Fisher Scientific | 11879020   |
| SB431542                                    | LC laboratories          | S-7800     |
| Seahorse XF Cell Mito Stress Test Kit       | Agilent                  | 103015-100 |
| SlowFade Gold Antifade Mountant             | Thermo Fisher Scientific | S36936     |
| StemPro-34 SFM                              | Thermo Fisher Scientific | 10639011   |
| TrypLE Select Enzyme 10x, no phenol red     | Thermo Fisher Scientific | A1217703   |
| UltraPure 0.5 M EDTA                        | Thermo Fisher Scientific | 15575020   |
| VEGF                                        | Peprtech                 | 100-20     |
| Y-27632 2HCl                                | Selleck Chemicals        | S1049      |
