# Supplementary material
Source: PubMed Central journal article supplement (PMC9855759)

Full unedited gels for **Figure 1C**

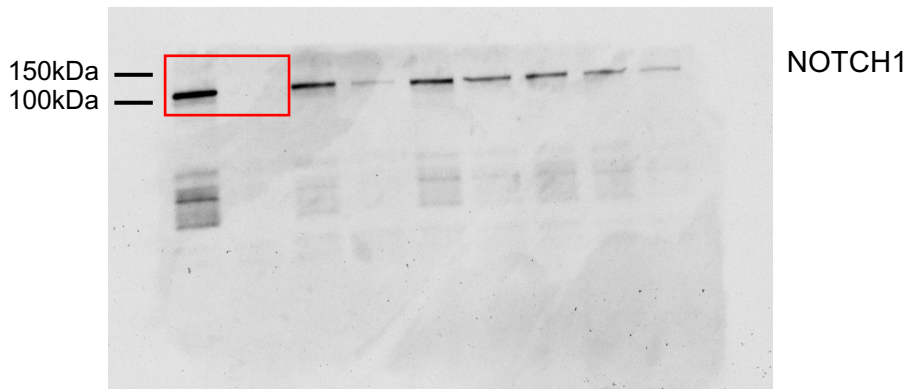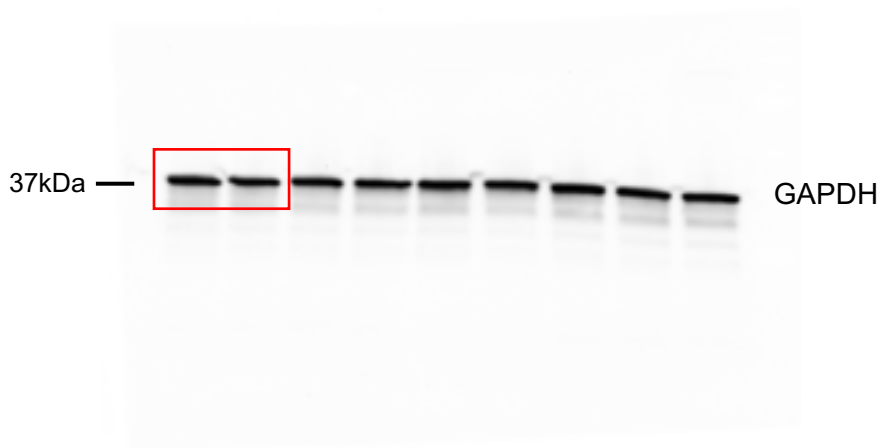

Full unedited gels for **Figure S1E**

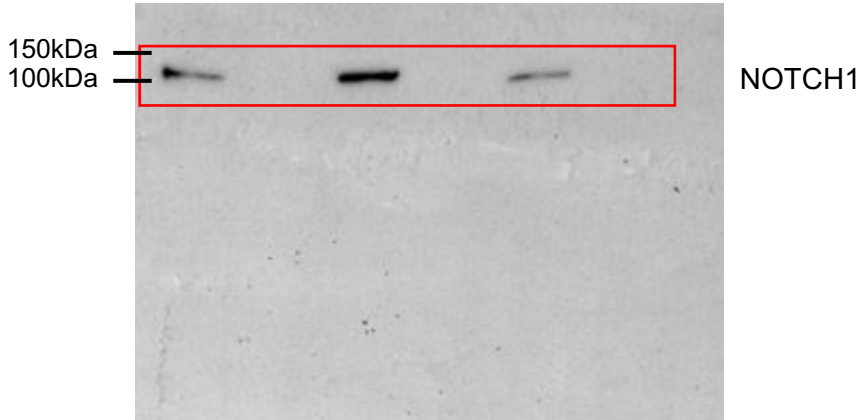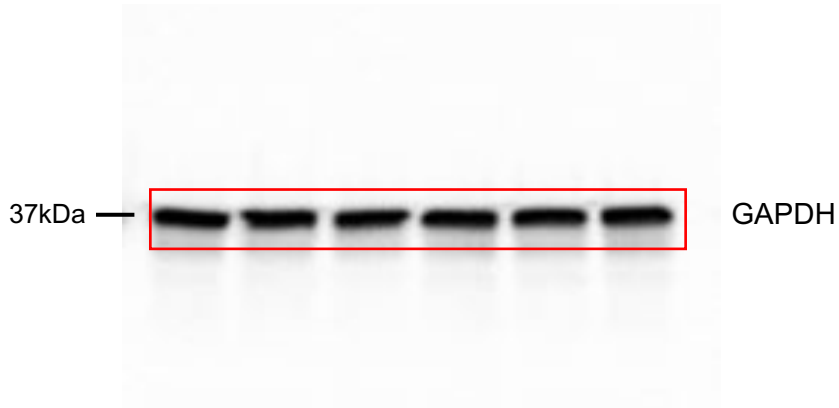

Supplement: res-132-187-s003.pdf [file res-132-187-s003.pdf]
